# Supplementary material for: Synthesis and electrochemical performance of xLiV3O8·yLi3V2(PO4)3/rGO composite cathode materials for lithium ion batteries
Source: Royal Society of Chemistry journal article supplement (doi:10.1039/c5ta03067f), 2015-01-01
Supplement: c5ta03067f1.pdf [file c5ta03067f1.pdf]

## Electronic Supplementary Information

### Synthesis and electrochemical performance of $x\text{LiV}_3\text{O}_8 \cdot y\text{Li}_3\text{V}_2(\text{PO}_4)_3/\text{rGO}$ composite cathode materials for lithium ion batteries

Yi Li, Dong Xie, Yi-di Zhang, Ding Zhou, Xiao-qing Niu, Yue-yu Tong, Dong-huang  
Wang, Xiu-li Wang, Chang-dong Gu, and Jiang-ping Tu\*

*State Key Laboratory of Silicon Materials, Key Laboratory of Advanced Materials and  
Applications for Batteries of Zhejiang Province, and School of Materials Science and Engineering,  
Zhejiang University, Hangzhou 310027, China. E-mail: tujp@zju.edu.cn; Tel: +86 571 87952856;*

*Fax: +86 571 87952573.*

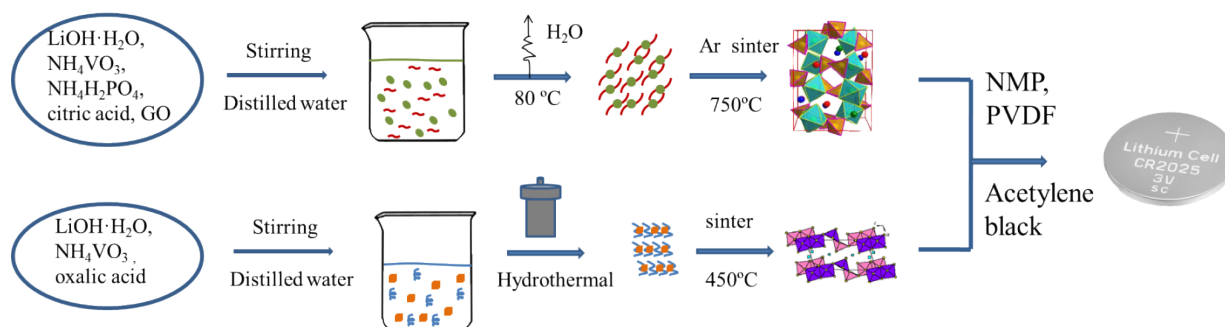

**Scheme 1.** Schematic illustration of synthetic process of  $x\text{LVO} \cdot y\text{LVP}/\text{rGO}$  composites.

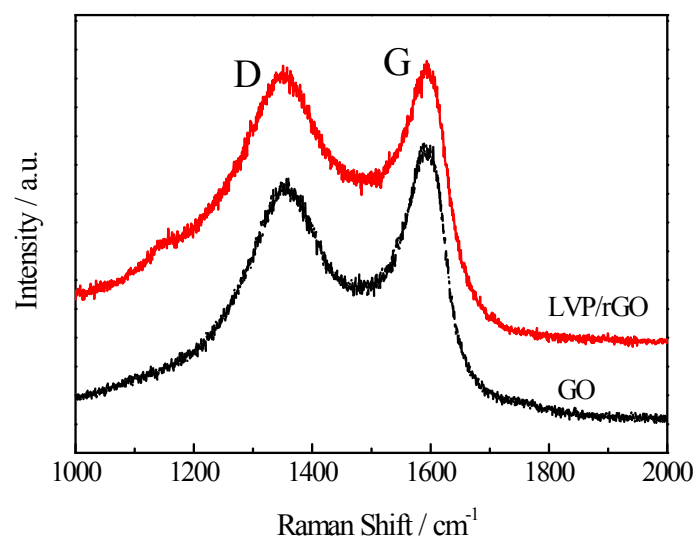

**Figure S1** Raman spectra of LVP/rGO composite and GO.

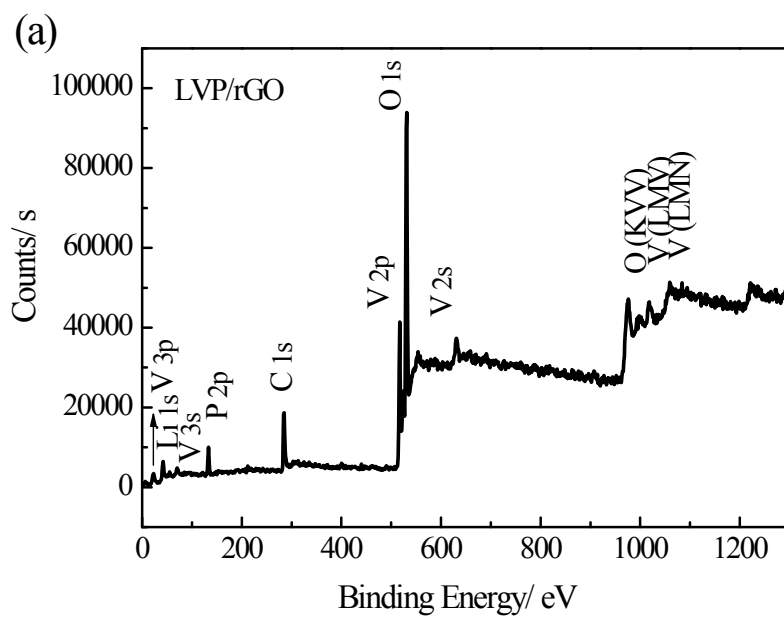

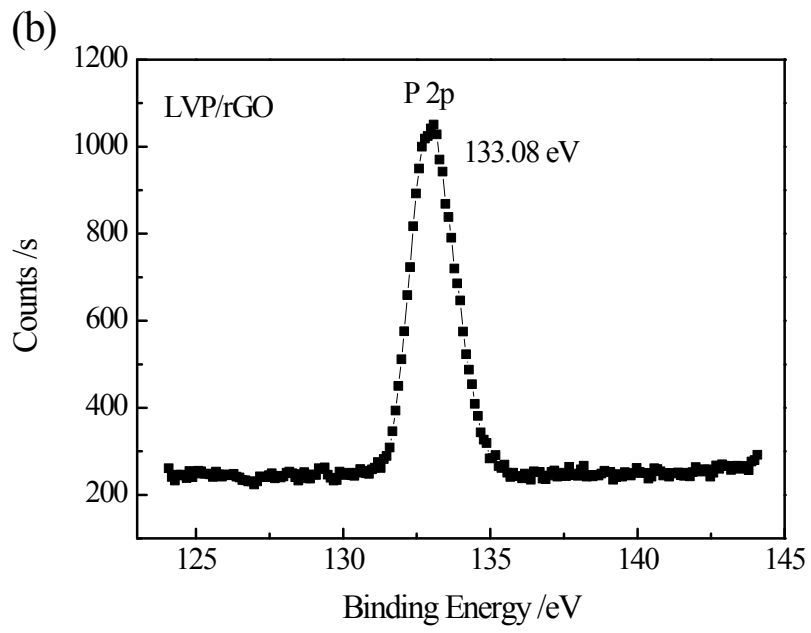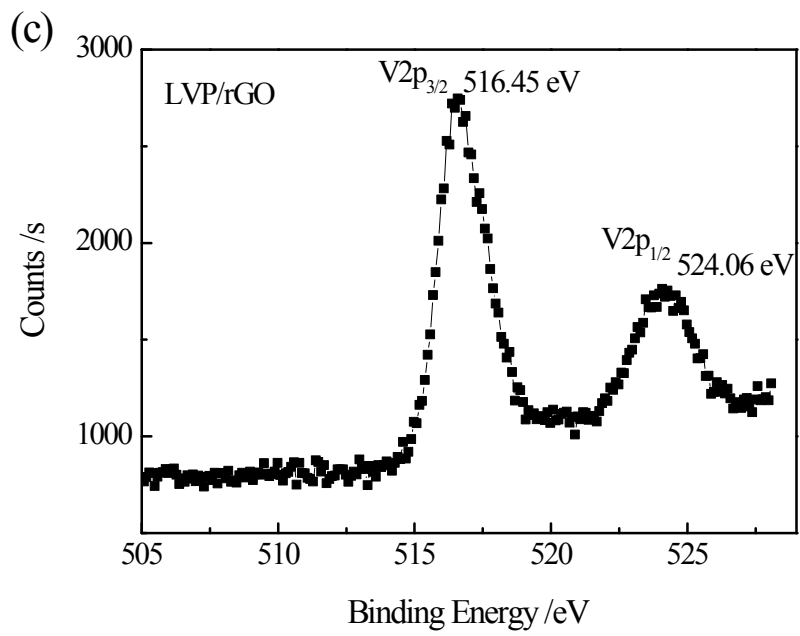

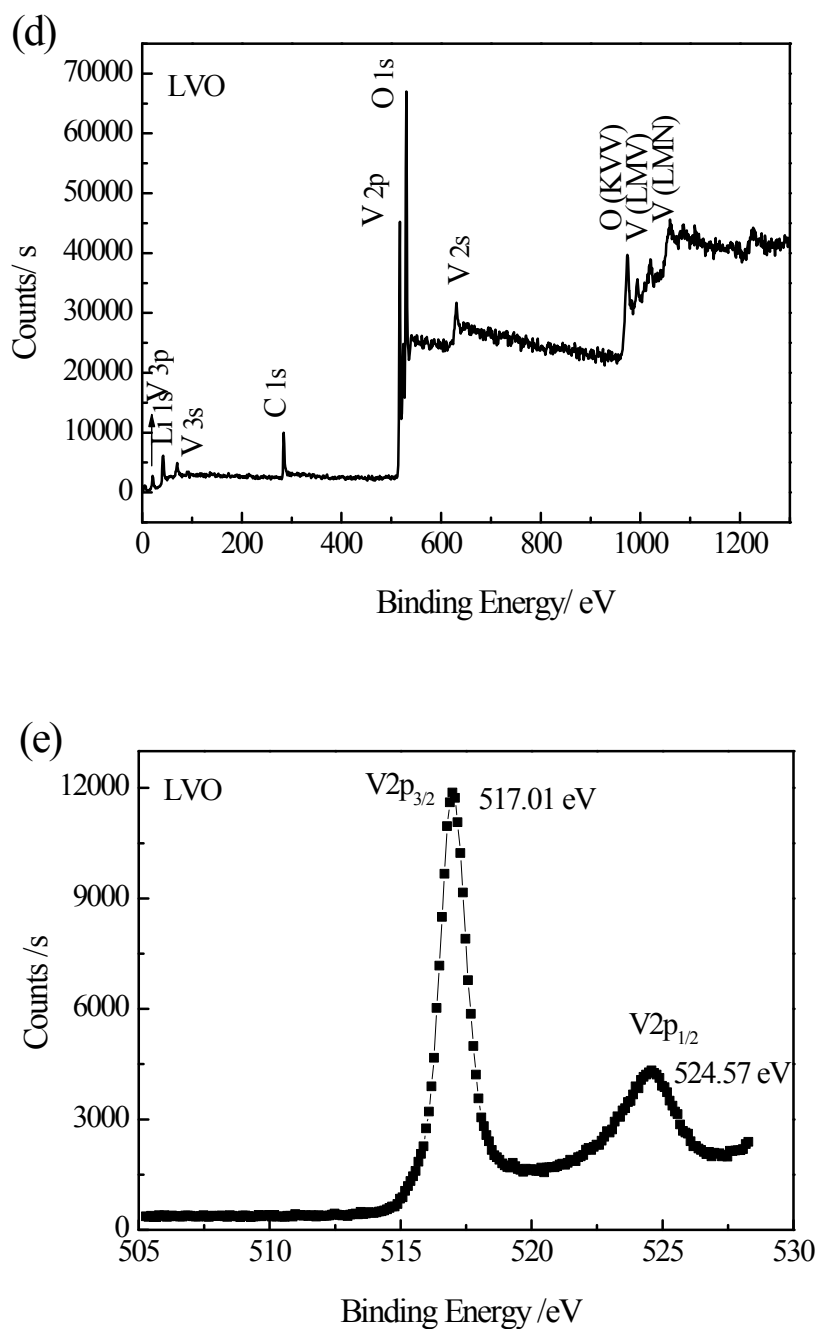

**Figure S2.** XPS spectra of LVP/rGO and LVO powders: (a) full-spectrum of LVP/rGO; (b) core-level spectrum of P2p in LVP/rGO; (c) core-level spectrum of V2p in LVP/rGO; (d) full-spectrum of LVO; (e) core-level spectrum of V2p in LVO.

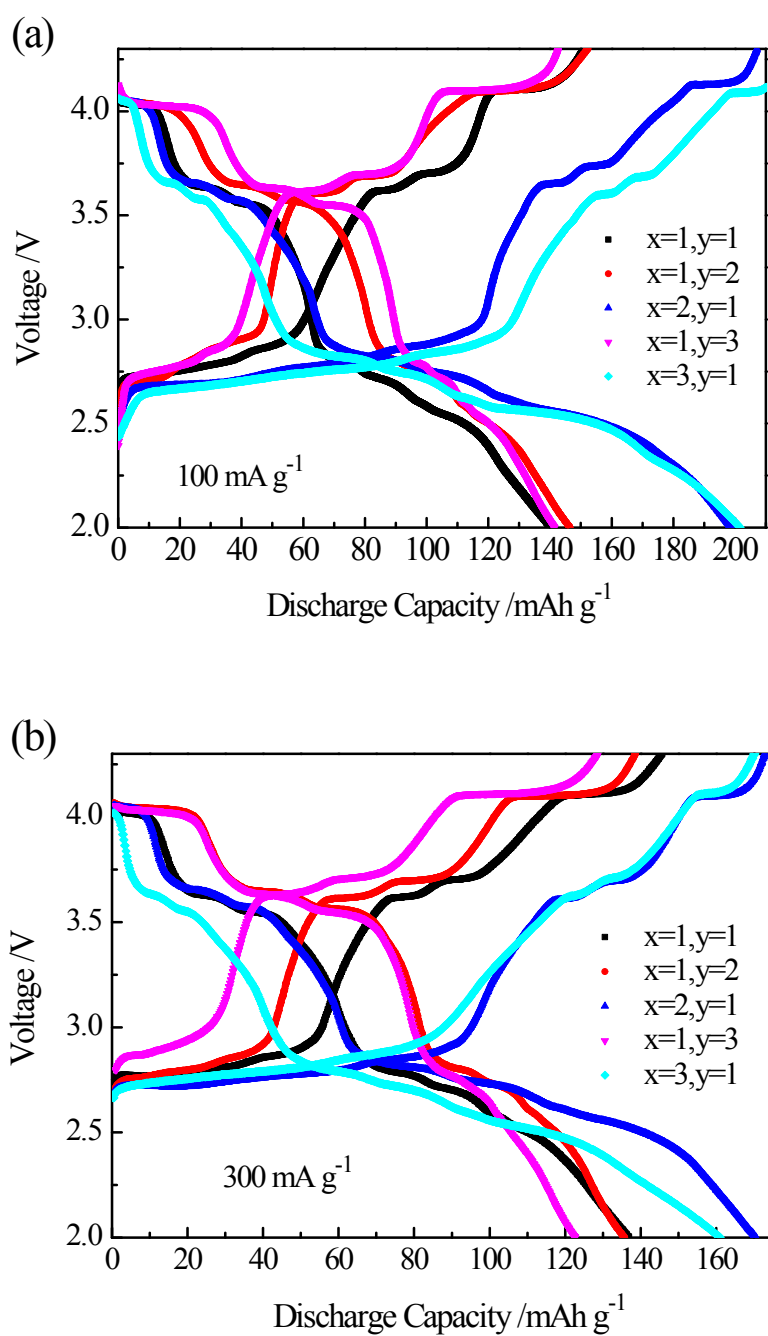

**Figure S3.** Charge-discharge curves of  $x\text{LVO} \cdot y\text{LVP}/\text{rGO}$  ( $x: y = 2: 1, 3: 1, 1: 1, 1: 2, 1: 3$ ) electrodes at different current densities: (a) 100 mA g<sup>-1</sup>; (b) 300 mA g<sup>-1</sup>.
